# Supplementary material for: Hierarchical Clustering of Breast Cancer Methylomes Revealed Differentially Methylated and Expressed Breast Cancer Genes
Source: PLoS One. 2015 Feb 23;10(2):e0118453. doi: 10.1371/journal.pone.0118453 (PMC4338251; doi:10.1371/journal.pone.0118453)
Supplement: S7 Table — (XLSX) [file pone.0118453.s020.xlsx]

## Sheet: Table S7
Tables S7. List of HMRs used for methylation analysis of the BRCA dataset.
Chromosome	Left coordinate	Right coordinate	Cluster ID	No. of CpG	No. of CpG in array
chr1	553437	560610	A-8	171	16
chr1	703179	705617	A-1	122	8
chr1	751238	754284	A-1	149	10
chr1	791758	795805	A-1	110	6
chr1	834942	836752	A-6	120	8
chr1	844774	846819	A-1	84	12
chr1	848268	851752	A-1	365	15
chr1	858178	862318	A-6	233	13
chr1	864825	868714	A-1	319	11
chr1	883141	886665	A-1	339	16
chr1	891234	892758	A-1	101	9
chr1	923333	927740	A-1	458	21
chr1	932157	932478	A-7	19	6
chr1	938161	940388	A-8	85	10
chr1	944338	947304	A-1	252	14
chr1	957698	959630	A-6	184	7
chr1	983031	986091	A-1	185	9
chr1	988868	990900	A-1	84	6
chr1	993072	994963	A-1	165	9
chr1	1039766	1042590	A-1	234	15
chr1	1061668	1063287	A-6	91	6
chr1	1082197	1084007	C-5	96	6
chr1	1087516	1092002	A-8	257	20
chr1	1098746	1099620	A-7	46	7
chr1	1131209	1133032	A-6	103	12
chr1	1133181	1134657	C-4	74	6
chr1	1137631	1139492	A-7	85	6
chr1	1155952	1158046	A-1	227	6
chr1	1171461	1172824	A-6	116	7
chr1	1197454	1200261	A-1	215	9
chr1	1206832	1207810	A-8	29	6
chr1	1229121	1235423	A-1	446	22
chr1	1248932	1251559	A-1	154	11
chr1	1256040	1259042	A-8	171	19
chr1	1272152	1284332	A-1	745	22
chr1	1284491	1286480	A-7	57	6
chr1	1298796	1301146	A-1	185	11
chr1	1323493	1326097	A-1	197	14
chr1	1331591	1333829	A-1	172	12
chr1	1344932	1346923	A-6	141	6
chr1	1357911	1362374	A-1	235	12
chr1	1387002	1388373	A-8	48	7
chr1	1395606	1398475	A-1	192	11
chr1	1436237	1439011	A-1	218	8
chr1	1464732	1466379	A-6	189	8
chr1	1498445	1501556	A-1	240	12
chr1	1539028	1542406	A-1	268	16
chr1	1555348	1557939	A-6	234	11
chr1	1579173	1581091	A-1	138	10
chr1	1644572	1646377	A-1	130	6
chr1	1665950	1668884	A-1	221	8
chr1	1698492	1700938	A-1	188	10
chr1	1703344	1704800	C-4	68	6
chr1	1810093	1814250	A-1	327	13
chr1	1829674	1831518	C-5	156	7
chr1	1839958	1841244	A-1	125	16
chr1	1924695	1925528	A-6	58	6
chr1	1939627	1941472	A-6	168	8
chr1	1970497	1973220	A-1	252	11
chr1	2053544	2055240	A-6	106	11
chr1	2110578	2112583	A-6	107	7
chr1	2114741	2117031	A-1	148	17
chr1	2128804	2130365	A-8	58	6
chr1	2133564	2136440	A-8	119	7
chr1	2148123	2154599	A-1	564	23
chr1	2211409	2213161	B-8	56	6
chr1	2221642	2222837	B-8	58	6
chr1	2235492	2236945	A-1	147	6
chr1	2242064	2244496	A-8	122	8
chr1	2311459	2314447	A-1	209	16
chr1	2333024	2338529	A-1	279	30
chr1	2349259	2350774	B-8	54	6
chr1	2425565	2427102	B-6	76	6
chr1	2446134	2448789	A-1	160	18
chr1	2449268	2452654	A-6	236	12
chr1	2465634	2470864	A-6	210	9
chr1	2504779	2509580	A-1	235	19
chr1	2548599	2550914	A-6	120	9
chr1	2563450	2565250	A-1	118	7
chr1	2712414	2715441	C-4	103	9
chr1	2757048	2762745	C-8	185	8
chr1	2767187	2779940	B-6	342	14
chr1	2809780	2815673	B-7	220	15
chr1	2816998	2818305	B-6	59	9
chr1	2825037	2830826	B-2	198	18
chr1	2837041	2841099	B-2	155	15
chr1	2865010	2874237	B-2	157	7
chr1	2886688	2891311	A-3	142	6
chr1	2907096	2920321	B-6	319	18
chr1	2921072	2928106	A-3	175	11
chr1	2928534	2930106	A-2	61	6
chr1	2930275	2936839	B-2	138	6
chr1	2967844	2973489	A-8	228	13
chr1	2973809	2977870	A-6	483	27
chr1	2978718	2980952	B-4	131	6
chr1	2982184	2985366	B-2	83	7
chr1	3006748	3017722	B-7	233	7
chr1	3034161	3037035	B-1	79	6
chr1	3045552	3047220	B-6	74	10
chr1	3078918	3079911	B-2	37	6
chr1	3122311	3126189	B-6	130	12
chr1	3129726	3133248	B-2	109	11
chr1	3135111	3139568	B-2	140	11
chr1	3150142	3152314	A-8	66	10
chr1	3153870	3156100	B-4	106	6
chr1	3181251	3182436	B-6	42	8
chr1	3185014	3186888	B-2	78	6
chr1	3219429	3222778	A-6	113	8
chr1	3292768	3293991	B-7	34	8
chr1	3359351	3362103	A-1	154	6
chr1	3435655	3438557	A-1	164	6
chr1	3516758	3518664	A-1	133	10
chr1	3529034	3532399	A-1	215	13
chr1	3555359	3559807	A-6	353	49
chr1	3596484	3597665	A-7	63	10
chr1	3605140	3606657	A-7	60	7
chr1	3652823	3654472	A-6	122	13
chr1	3677987	3680062	A-1	138	11
chr1	3701521	3703969	A-1	129	13
chr1	3762559	3765659	A-1	198	20
chr1	3805834	3808218	A-1	151	14
chr1	3968241	3998512	A-3	432	11
chr1	4060511	4092710	C-3	548	10
chr1	4092769	4108239	C-3	254	8
chr1	4121129	4137491	A-3	305	11
chr1	4292003	4371927	A-3	917	9
chr1	4431539	4515649	A-3	1091	7
chr1	4613099	4649118	A-8	918	31
chr1	4650493	4671933	A-3	473	9
chr1	4671973	4685757	A-2	284	6
chr1	4686174	4699958	A-2	301	6
chr1	4699999	4735878	B-3	582	13
chr1	4742423	4783769	A-3	388	8
chr1	5209113	5316431	C-3	1256	8
chr1	5463044	5483247	A-3	294	6
chr1	5973740	5976817	A-1	230	15
chr1	6007841	6009231	A-6	57	9
chr1	6161025	6164603	A-1	271	14
chr1	6180477	6182933	A-1	95	11
chr1	6187313	6189510	A-6	154	13
chr1	6191293	6192500	A-6	106	7
chr1	6216994	6219260	A-1	155	12
chr1	6224047	6230441	A-1	361	23
chr1	6242260	6244810	A-1	215	11
chr1	6367716	6369398	A-8	42	7
chr1	6374044	6377107	A-1	198	15
chr1	6400887	6403647	A-6	227	14
chr1	6405420	6408982	A-6	178	10
chr1	6429510	6433360	A-8	223	10
chr1	6436500	6438769	B-8	242	7
chr1	6453432	6455259	A-2	108	7
chr1	6467406	6469841	A-6	117	10
chr1	6471469	6474844	A-1	133	11
chr1	6478556	6480795	A-1	133	9
chr1	6535828	6537611	A-1	112	10
chr1	6561975	6563877	A-1	107	11
chr1	6580856	6587186	A-1	360	21
chr1	6594270	6598832	A-1	400	16
chr1	6607287	6608752	A-6	107	11
chr1	6683408	6684908	A-1	112	11
chr1	6766346	6769360	A-1	274	18
chr1	6944436	6946451	B-6	91	8
chr1	7662515	7664030	A-1	123	8
chr1	7684747	7689134	A-6	354	10
chr1	7753271	7754944	A-1	117	11
chr1	7765592	7767600	A-1	184	10
chr1	7936343	7937570	A-1	74	6
chr1	7943212	7945295	A-1	107	11
chr1	7997621	8012000	A-1	299	19
chr1	8300376	8301535	A-6	93	6
chr1	8403411	8407646	A-1	155	12
chr1	8797217	8801670	A-1	152	17
chr1	8856322	8863441	A-1	272	20
chr1	9108245	9113051	A-1	203	16
chr1	9163963	9166302	A-1	178	8
chr1	9180535	9181803	A-6	64	6
chr1	9216747	9218380	A-1	140	9
chr1	9274519	9277730	A-1	225	9
chr1	9411070	9412721	A-1	65	6
chr1	9477595	9478378	C-5	48	7
chr1	9521607	9524090	A-1	194	14
chr1	9570873	9573106	A-1	185	7
chr1	9633917	9636134	A-6	169	11
chr1	9804580	9809317	A-1	253	21
chr1	9891301	9894014	A-1	163	14
chr1	9924852	9926885	A-1	97	12
chr1	9979432	9981009	A-6	144	13
chr1	10014733	10018448	A-1	164	12
chr1	10192054	10195326	A-1	207	13
chr1	10380836	10383515	A-1	172	16
chr1	10412548	10414168	A-1	135	14
chr1	10454045	10455849	A-1	84	13
chr1	10457076	10459006	A-1	76	8
chr1	10674394	10678918	A-1	289	8
chr1	10770071	10779865	A-1	400	23
chr1	11041250	11044178	A-1	208	13
chr1	11080784	11083048	A-1	107	18
chr1	11244431	11246293	A-1	90	13
chr1	11255183	11256813	A-1	96	10
chr1	11458740	11463197	A-1	215	10
chr1	11631122	11633573	A-8	123	7
chr1	11635638	11638509	A-6	168	17
chr1	11646455	11647835	A-1	110	10
chr1	11662881	11665416	A-1	158	13
chr1	11672439	11676344	A-6	230	16
chr1	11683346	11685028	B-6	58	7
chr1	11718332	11720338	A-1	78	15
chr1	11784973	11790040	A-1	164	20
chr1	11840835	11846003	A-8	114	13
chr1	11889828	11893110	A-1	116	6
chr1	11907343	11909882	A-1	166	10
chr1	11916608	11918233	A-1	69	9
chr1	11962167	11965523	A-1	135	13
chr1	12001529	12003080	A-1	91	13
chr1	12045691	12049276	A-6	113	11
chr1	12149343	12151650	A-6	132	9
chr1	12531748	12533009	C-4	55	6
chr1	12577486	12579452	A-1	107	6
chr1	12597068	12603426	A-1	241	20
chr1	12804617	12817286	A-2	123	8
chr1	13711611	13714574	A-6	161	11
chr1	13782108	13783948	A-6	102	16
chr1	13898640	13900770	A-1	157	16
chr1	13947706	13950009	A-1	180	11
chr1	14088744	14092911	A-1	108	8
chr1	14796663	14799929	A-1	172	13
chr1	15122809	15126612	A-1	228	7
chr1	15128640	15129131	A-7	15	6
chr1	15144281	15145300	A-8	30	6
chr1	15350511	15354128	A-1	239	25
chr1	15446043	15447030	A-1	61	9
chr1	15608183	15611799	A-1	205	11
chr1	15722369	15727151	A-1	256	28
chr1	15801256	15803144	A-1	82	6
chr1	15814950	15819364	A-1	168	9
chr1	15882527	15885106	A-1	150	11
chr1	15955128	15959027	A-6	186	11
chr1	16030695	16035722	B-4	264	7
chr1	16045681	16051383	A-1	320	20
chr1	16173936	16175688	A-1	103	10
chr1	16271844	16273252	A-1	109	8
chr1	16351290	16356233	A-1	193	10
chr1	16405106	16407283	A-1	166	10
chr1	16415109	16417151	A-1	91	7
chr1	16425856	16427367	C-4	113	7
chr1	16435229	16437238	A-1	73	10
chr1	16549776	16552433	A-1	119	13
chr1	16565788	16568390	A-1	103	9
chr1	16639220	16641036	A-1	95	14
chr1	16697332	16699260	A-1	172	6
chr1	16719639	16720466	A-8	53	6
chr1	16733272	16735214	A-8	138	6
chr1	16811119	16813749	A-1	131	11
chr1	16842588	16844323	A-1	89	9
chr1	16891422	16894001	A-6	238	7
chr1	16898107	16900650	A-6	217	10
chr1	16958099	16959423	A-8	112	6
chr1	17071112	17072902	A-6	123	8
chr1	17087472	17089082	A-6	75	6
chr1	17102903	17105415	B-4	74	6
chr1	17112642	17114292	A-1	148	7
chr1	17120422	17121464	A-8	22	7
chr1	17178850	17180945	A-6	110	10
chr1	17209513	17211684	A-1	129	11
chr1	17251116	17253906	A-1	79	9
chr1	17317287	17319132	A-1	97	10
chr1	17635916	17641224	A-1	323	26
chr1	17737211	17740325	A-1	178	7
chr1	18305578	18311190	A-6	304	20
chr1	18679103	18680689	A-8	33	8
chr1	18828436	18847056	A-6	815	53
chr1	19100246	19103292	A-1	119	16
chr1	19152272	19156587	A-1	270	10
chr1	19407902	19410549	A-1	127	9
chr1	19449718	19452321	A-1	139	19
chr1	19472950	19473662	A-8	69	11
chr1	19486245	19489041	A-8	109	14
chr1	19509956	19512779	A-1	166	12
chr1	19536644	19538080	B-5	61	6
chr1	19682344	19685985	A-1	202	11
chr1	19795368	19797623	A-1	97	17
chr1	19842272	19845401	A-6	254	13
chr1	19863480	19865435	A-6	185	9
chr1	19998432	19999941	A-1	106	11
chr1	20080981	20083138	A-1	116	12
chr1	20384266	20387977	A-6	87	8
chr1	20564848	20567837	B-6	154	7
chr1	20681737	20687003	A-1	339	18
chr1	20706168	20707582	A-1	71	14
chr1	20749892	20755020	A-6	257	18
chr1	20832203	20833816	A-1	111	15
chr1	20859216	20861564	A-1	94	10
chr1	20895216	20896425	A-1	55	6
chr1	20916401	20917592	A-1	128	12
chr1	20930355	20933020	A-6	172	16
chr1	20983709	20987491	A-1	253	11
chr1	21373593	21376601	A-1	180	11
chr1	21488168	21490091	A-6	117	9
chr1	21538815	21545822	A-1	243	11
chr1	21638549	21640325	A-1	118	12
chr1	21707824	21709408	A-6	119	11
chr1	21749298	21750560	A-4	27	6
chr1	21819267	21825427	A-1	178	6
chr1	21867206	21869294	A-6	126	9
chr1	21980432	21983285	A-1	173	17
chr1	22132378	22137131	A-6	230	10
chr1	22222394	22225736	A-6	116	11
chr1	22251322	22253680	A-1	162	6
chr1	22339252	22343904	A-1	259	9
chr1	22650655	22652473	A-1	90	7
chr1	22840455	22842719	A-1	42	6
chr1	22908853	22911170	A-1	228	9
chr1	23152117	23153132	B-6	127	6
chr1	23217605	23220429	A-1	147	13
chr1	23365913	23369235	A-1	174	14
chr1	23376221	23377219	A-6	70	6
chr1	23539277	23544513	A-1	185	16
chr1	23565400	23571755	A-1	193	23
chr1	23622408	23624606	A-6	137	12
chr1	23681899	23684169	A-1	158	12
chr1	23727152	23731565	A-1	137	14
chr1	23753295	23762363	A-1	276	27
chr1	23890408	23892949	A-1	81	11
chr1	23940878	23944724	A-1	188	16
chr1	23976666	23979448	A-1	124	12
chr1	23989752	23991823	A-1	77	10
chr1	23997965	24001264	A-1	173	22
chr1	24023576	24025526	A-1	75	10
chr1	24066426	24068623	A-1	124	17
chr1	24155518	24162138	A-1	180	14
chr1	24176741	24180016	A-1	118	9
chr1	24309830	24312005	A-8	66	9
chr1	24384825	24387280	A-6	121	13
chr1	24516829	24519327	A-1	32	16
chr1	24520789	24522466	A-1	108	7
chr1	24614029	24618696	A-1	113	17
chr1	24700907	24703009	A-1	155	15
chr1	24754452	24755578	A-6	73	7
chr1	24840648	24844744	A-1	218	16
chr1	24942515	24946504	A-1	227	18
chr1	25046965	25048324	C-5	99	6
chr1	25126789	25131827	A-6	414	36
chr1	25430896	25432710	A-1	68	14
chr1	25444671	25447576	A-1	191	14
chr1	25535700	25539083	A-1	173	9
chr1	25628579	25631813	A-1	209	17
chr1	25742333	25744401	A-1	138	13
chr1	25814400	25817389	A-1	293	16
chr1	25998574	26000331	A-1	115	9
chr1	26017067	26020962	A-1	164	23
chr1	26057517	26059340	A-1	103	8
chr1	26073749	26075543	A-6	112	6
chr1	26103269	26106497	A-1	183	25
chr1	26121505	26123136	A-6	90	7
chr1	26195877	26198026	A-1	68	13
chr1	26233738	26235998	B-4	118	7
chr1	26244451	26246188	A-6	139	11
chr1	26309237	26314224	A-1	246	17
chr1	26360177	26361708	A-6	128	9
chr1	26367680	26370137	A-1	97	17
chr1	26376170	26377750	A-8	43	11
chr1	26432520	26434672	A-1	118	14
chr1	26476556	26479640	A-1	95	11
chr1	26504726	26506730	A-1	66	15
chr1	26607571	26613765	A-6	167	24
chr1	26630551	26632465	A-1	80	15
chr1	26669443	26673609	A-1	221	14
chr1	26728133	26731803	A-1	151	8
chr1	26818161	26821449	C-5	186	7
chr1	26891315	26898493	A-1	379	17
chr1	26984911	26988726	A-1	120	22
chr1	27060365	27065285	A-8	195	20
chr1	27088109	27089945	A-1	111	12
chr1	27098023	27100110	A-1	66	11
chr1	27120331	27122541	A-1	101	17
chr1	27158278	27160359	A-1	111	10
chr1	27191634	27194942	A-1	224	18
chr1	27206843	27212887	A-1	161	16
chr1	27353129	27354979	A-1	79	10
chr1	27433039	27435714	A-1	140	12
chr1	27520631	27522399	A-1	89	10
chr1	27539918	27543380	A-8	85	9
chr1	27548029	27549788	A-6	134	6
chr1	27564217	27566555	A-1	149	16
chr1	27581975	27582804	A-1	50	16
chr1	27590486	27592432	A-1	108	11
chr1	27687238	27689997	A-1	98	18
chr1	27725807	27728794	A-6	125	6
chr1	27773673	27775428	B-6	130	6
chr1	27798323	27803998	A-1	235	15
chr1	27832911	27834455	A-6	105	9
chr1	27857791	27859753	B-4	95	7
chr1	27868235	27871575	A-1	66	8
chr1	27923787	27926502	A-1	134	13
chr1	27971292	27973606	A-1	80	10
chr1	28029226	28032976	A-1	101	13
chr1	28071298	28072640	A-6	87	9
chr1	28112890	28114273	A-1	91	16
chr1	28158354	28159842	A-1	114	9
chr1	28286217	28288400	A-1	81	11
chr1	28430957	28432513	A-1	71	11
chr1	28434302	28436477	A-1	105	9
chr1	28444657	28449589	A-8	106	8
chr1	28457536	28460647	A-1	168	14
chr1	28527565	28529042	A-1	79	10
chr1	28568400	28570124	A-1	96	10
chr1	28704231	28709937	A-1	153	14
chr1	28715548	28718687	A-1	139	12
chr1	28751319	28753706	A-1	108	10
chr1	28778942	28782601	A-1	162	20
chr1	28840495	28843395	A-1	104	14
chr1	28867286	28869148	A-1	128	10
chr1	28935017	28937492	A-1	166	16
chr1	28973987	28975502	C-4	54	6
chr1	29010925	29012886	A-6	145	8
chr1	29085656	29087694	A-1	115	14
chr1	29113101	29114695	A-1	136	9
chr1	29320407	29324860	A-6	417	19
chr1	29377903	29381803	A-1	174	14
chr1	29428810	29430603	A-1	64	10
chr1	29434660	29439195	A-1	315	11
chr1	29458389	29459727	A-6	101	10
chr1	30963156	30965304	A-1	157	14
chr1	31152879	31154740	A-1	186	8
chr1	31307881	31311609	A-1	119	13
chr1	31540289	31543528	A-1	103	17
chr1	31618310	31619509	A-6	58	12
chr1	31657611	31660831	A-1	158	14
chr1	31811904	31816206	A-8	93	13
chr1	31855319	31856809	A-6	101	8
chr1	31882070	31883868	A-1	93	12
chr1	31938635	31943987	A-6	126	11
chr1	31998705	32000207	A-6	67	6
chr1	32000589	32003995	A-1	228	12
chr1	32026272	32027937	A-1	87	7
chr1	32054014	32054606	A-8	21	6
chr1	32164114	32177085	A-1	280	8
chr1	32182422	32183427	C-6	63	6
chr1	32251267	32254851	A-1	194	8
chr1	32310468	32312126	A-1	100	9
chr1	32345646	32347854	A-1	89	13
chr1	32417365	32419545	A-1	128	17
chr1	32437769	32440118	A-6	68	12
chr1	32442827	32444471	A-1	107	15
chr1	32459844	32461304	A-1	78	14
chr1	32477303	32480021	A-6	149	11
chr1	32529769	32531101	A-1	90	13
chr1	32570109	32577053	A-1	252	15
chr1	32599783	32600817	A-6	104	11
chr1	32631744	32633960	A-1	92	8
chr1	32702110	32704045	A-6	101	13
chr1	32777010	32778768	A-1	139	6
chr1	32887450	32890588	A-1	171	16
chr1	32939700	32942328	A-1	120	6
chr1	32979090	32982685	A-1	156	7
chr1	32991744	32994985	A-1	136	7
chr1	33053970	33057438	A-1	149	15
chr1	33122845	33126699	A-1	144	11
chr1	33162832	33164389	A-8	65	6
chr1	33199194	33203851	A-1	209	17
chr1	33273369	33275566	A-1	69	11
chr1	33318568	33320572	A-6	100	16
chr1	33364892	33366422	B-4	61	6
chr1	33418226	33421406	A-1	173	13
chr1	33493391	33496624	A-1	236	10
chr1	33583069	33589745	A-1	226	14
chr1	33667958	33670138	A-1	151	7
chr1	33709814	33711522	A-1	51	12
chr1	33865655	33872527	A-8	75	6
chr1	34084278	34104853	A-3	148	11
chr1	34401002	34405653	A-6	279	28
chr1	34406321	34446569	A-8	400	22
chr1	34992837	34994179	A-7	22	7
chr1	35018975	35020928	A-6	90	9
chr1	35096843	35098690	A-1	72	17
chr1	35122465	35124490	B-8	108	9
chr1	35162760	35169277	A-6	244	9
chr1	35222000	35223809	A-6	69	6
chr1	35268864	35270477	A-1	69	8
chr1	35316987	35318334	A-1	63	12
chr1	35427520	35432416	A-1	222	21
chr1	35506711	35508241	A-1	90	10
chr1	35792069	35797249	A-1	156	19
chr1	35811100	35812144	A-6	83	8
chr1	35815058	35817045	A-7	122	6
chr1	35878155	35881415	A-1	111	11
chr1	35955868	35957565	A-1	91	6
chr1	36006719	36008792	A-1	112	15
chr1	36045672	36048639	A-1	169	10
chr1	36120945	36122490	A-1	102	9
chr1	36167668	36170682	A-1	164	14
chr1	36386547	36390534	A-1	114	12
chr1	36393386	36396984	A-1	179	6
chr1	36461292	36464441	A-1	111	12
chr1	36544159	36545805	A-6	123	11
chr1	36560685	36562840	A-6	162	9
chr1	36622505	36626038	A-1	134	12
chr1	36635207	36636525	A-1	67	13
chr1	36687972	36689528	A-1	81	17
chr1	36701520	36702984	A-1	80	11
chr1	37270107	37277529	A-6	383	16
chr1	37546800	37557037	B-6	160	7
chr1	37711253	37716264	A-1	181	18
chr1	37751453	37753789	A-1	145	13
chr1	37791369	37792740	A-1	60	13
chr1	37794427	37795984	A-6	41	8
chr1	37832484	37834927	A-1	77	10
chr1	37870559	37874744	A-6	163	16
chr1	37927706	37931819	A-1	214	30
chr1	37990434	37992816	A-6	177	7
chr1	38000294	38005986	A-6	160	18
chr1	38031447	38034462	A-1	198	15
chr1	38045395	38048363	A-1	169	12
chr1	38096491	38098915	A-1	92	11
chr1	38168815	38171093	A-1	106	9
chr1	38184442	38186113	A-7	28	6
chr1	38226322	38229068	A-1	107	14
chr1	38233536	38235139	A-6	73	6
chr1	38242061	38244248	A-1	123	10
chr1	38250507	38251815	A-1	59	14
chr1	38282520	38286421	A-6	434	21
chr1	39041887	39043082	A-6	92	7
chr1	39056196	39057565	C-5	110	6
chr1	39096861	39100005	A-1	165	14
chr1	39110171	39112869	A-1	111	16
chr1	39179345	39180585	A-6	24	6
chr1	39228314	39231253	A-1	123	16
chr1	39264045	39265622	A-1	75	10
chr1	39319081	39321041	A-6	170	11
chr1	39342909	39347318	A-1	196	7
chr1	39644907	39651011	A-1	194	20
chr1	39728956	39730884	A-6	233	16
chr1	39812155	39815585	A-1	212	12
chr1	39877555	39878351	A-6	89	7
chr1	39909372	39911100	A-6	105	8
chr1	39929286	39931145	A-6	123	15
chr1	39976778	39977997	A-1	70	8
chr1	40026010	40027981	A-6	218	15
chr1	40120503	40122175	A-1	67	7
chr1	40138764	40141239	A-1	201	15
chr1	40193074	40195428	A-6	112	15
chr1	40277214	40280769	A-1	148	17
chr1	40332985	40335992	A-1	72	7
chr1	40370980	40371712	A-8	47	6
chr1	40399185	40401490	A-1	94	14
chr1	40494798	40497287	A-1	95	15
chr1	40552982	40556102	A-6	200	19
chr1	40611063	40613510	A-1	98	7
chr1	40687784	40689461	A-1	88	9
chr1	40715127	40717213	A-1	93	9
chr1	40746592	40748039	A-1	86	10
chr1	40769175	40770992	A-1	47	12
chr1	40891861	40892698	B-6	35	6
chr1	40903227	40904609	A-1	72	10
chr1	40929194	40931870	A-1	115	17
chr1	41020343	41022890	A-1	191	10
chr1	41056359	41057629	A-8	93	6
chr1	41099020	41101219	A-6	184	14
chr1	41217277	41221392	A-1	214	15
chr1	41479118	41481045	A-1	185	9
chr1	41598465	41601816	A-1	217	8
chr1	41619151	41622115	A-6	236	13
chr1	41661119	41662553	C-5	48	6
chr1	41752506	41755268	B-4	80	8
chr1	41899310	41901317	B-4	177	8
chr1	42152895	42158966	A-8	122	17
chr1	42272748	42274890	A-1	143	10
chr1	42571205	42574552	A-1	162	17
chr1	42618266	42619884	A-1	143	9
chr1	42693964	42695617	A-1	112	12
chr1	42700744	42702371	A-1	73	10
chr1	42895654	42897771	A-1	80	14
chr1	42919104	42922567	A-1	228	12
chr1	43003317	43006243	A-1	163	16
chr1	43023244	43024006	B-6	56	6
chr1	43054264	43056205	A-1	88	16
chr1	43084120	43085956	A-1	68	12
chr1	43160578	43163942	A-6	102	10
chr1	43193486	43198714	A-1	251	22
chr1	43306229	43307146	C-4	65	6
chr1	43385381	43387061	A-6	58	8
chr1	43409396	43413028	A-1	104	16
chr1	43522963	43524581	A-8	38	10
chr1	43586478	43588534	B-4	108	7
chr1	43596148	43598781	A-1	112	14
chr1	43604244	43607479	A-1	135	15
chr1	43626576	43629296	A-1	82	22
chr1	43691071	43693967	A-6	124	17
chr1	43768949	43772125	A-1	192	7
chr1	43886540	43890434	A-1	119	18
chr1	43944773	43947055	A-1	153	8
chr1	44171454	44176041	A-6	180	21
chr1	44184155	44186734	A-1	108	17
chr1	44207789	44209231	A-1	61	14
chr1	44212363	44214685	A-1	141	12
chr1	44216891	44219688	A-1	173	11
chr1	44228938	44231212	A-1	95	12
chr1	44267420	44270281	A-1	200	11
chr1	44450825	44452936	A-1	56	9
chr1	44592847	44594061	A-1	78	14
chr1	44642674	44649023	A-6	328	23
chr1	44655505	44657371	B-6	116	12
chr1	44855104	44856010	B-6	65	7
chr1	44911883	44913456	A-1	76	12
chr1	44977648	44978770	A-1	71	10
chr1	45012984	45015935	A-1	144	21
chr1	45022059	45023549	A-6	83	7
chr1	45037751	45040507	A-1	161	12
chr1	45044841	45049124	A-8	73	14
chr1	45080830	45081930	A-6	85	6
chr1	45223587	45225541	A-1	86	9
chr1	45248418	45251560	A-1	140	14
chr1	45442534	45445770	A-1	195	15
chr1	45541311	45543315	A-1	106	8
chr1	45564638	45568086	A-8	140	10
chr1	45577428	45579778	A-1	111	16
chr1	45726613	45730336	A-1	127	18
chr1	45737190	45741191	A-1	88	14
chr1	45757506	45761293	A-1	154	14
chr1	45788336	45791044	A-1	71	13
chr1	45821448	45825040	A-1	148	14
chr1	45922511	45927642	A-1	188	17
chr1	45988128	45989587	A-1	78	10
chr1	46041221	46043707	A-1	136	7
chr1	46366056	46374704	A-1	181	24
chr1	46404689	46405740	B-6	52	8
chr1	46435930	46437447	A-1	89	10
chr1	46440909	46443038	A-6	77	8
chr1	46485065	46486642	A-1	91	12
chr1	46539017	46544087	A-1	274	19
chr1	46577097	46580044	A-1	114	16
chr1	46632257	46635111	A-1	119	9
chr1	46723528	46724295	C-4	61	6
chr1	46726222	46732012	C-4	285	17
chr1	46781866	46783119	B-6	66	7
chr1	46842083	46843163	A-1	60	7
chr1	46854330	46855616	A-1	73	10
chr1	46904567	46907148	A-1	107	13
chr1	46954773	46958217	A-1	120	9
chr1	47261474	47265015	A-6	71	7
chr1	47427826	47428971	A-8	24	6
chr1	47461779	47464814	A-6	141	9
chr1	47467071	47470949	A-6	222	20
chr1	47550923	47553429	A-1	116	16
chr1	47569986	47573721	A-1	166	14
chr1	47654153	47655651	A-6	176	7
chr1	47670357	47673147	A-6	136	12
chr1	47673797	47678178	A-6	365	20
chr1	47682044	47685340	C-4	163	14
chr1	47686950	47688683	C-5	52	8
chr1	47746081	47747546	C-5	98	9
chr1	47771223	47772472	B-6	65	7
chr1	47945985	47949885	C-5	234	14
chr1	47963112	47965264	C-4	89	6
chr1	48232974	48236549	A-6	199	9
chr1	48706121	48711267	A-6	127	11
chr1	49007144	49041300	A-3	263	12
chr1	49125110	49138109	B-1	123	7
chr1	50256973	50287033	A-1	287	29
chr1	50311789	50359652	A-2	310	12
chr1	50570851	50572263	C-5	103	8
chr1	50653343	50660811	A-6	473	29
chr1	50660867	50669856	A-6	396	35
chr1	51196633	51199358	A-1	145	15
chr1	51205551	51211185	A-1	219	20
chr1	51214720	51217626	A-1	153	16
chr1	51473060	51476752	A-1	140	12
chr1	51582672	51583779	A-6	77	9
chr1	51755256	51757847	A-1	140	11
chr1	51854832	51858831	A-1	85	10
chr1	51967000	51969336	A-6	101	7
chr1	52115073	52117880	A-1	120	17
chr1	52227977	52229506	A-6	98	12
chr1	52270864	52272291	A-1	107	9
chr1	52291954	52297154	A-1	150	15
chr1	52379453	52382107	A-1	157	10
chr1	52602940	52605236	A-1	127	13
chr1	52641247	52644144	A-1	92	17
chr1	52789715	52792402	A-6	167	7
chr1	52840230	52841314	A-6	108	8
chr1	52871064	52872054	A-6	104	7
chr1	52935815	52937165	A-1	84	11
chr1	52964041	52966381	A-1	85	6
chr1	53080273	53083651	A-8	168	8
chr1	53158669	53160568	A-6	106	7
chr1	53165183	53166590	A-6	91	11
chr1	53299828	53301532	A-6	129	9
chr1	53434035	53435994	A-1	77	8
chr1	53457880	53459577	A-1	77	9
chr1	53475651	53477566	A-1	100	14
chr1	53563344	53567142	A-1	279	11
chr1	53975868	53978381	C-4	243	9
chr1	54075268	54077572	A-1	89	13
chr1	54126957	54129092	A-1	71	10
chr1	54182979	54185944	A-1	179	12
chr1	54289852	54293038	A-1	124	21
chr1	54437386	54439799	A-1	86	17
chr1	54642844	54647192	A-1	305	14
chr1	54712882	54714586	C-4	79	6
chr1	54724726	54729284	C-5	181	10
chr1	54779925	54781732	A-1	95	11
chr1	54953761	54955045	A-1	60	11
chr1	55001608	55004268	A-1	98	12
chr1	55038776	55040785	A-6	97	11
chr1	55121099	55127258	A-1	175	14
chr1	55218394	55219606	A-6	98	11
chr1	55234528	55235577	C-4	65	6
chr1	55277445	55279637	A-6	127	14
chr1	55449402	55454803	A-1	219	8
chr1	56813480	56818458	A-1	161	10
chr1	56882465	56885260	A-1	147	15
chr1	57618655	57670421	A-8	619	19
chr1	58485163	58513271	A-8	358	19
chr1	58783336	58785843	A-1	97	12
chr1	58808901	58817546	A-1	240	19
chr1	59017505	59024196	A-1	335	27
chr1	59051116	59055248	A-1	161	16
chr1	59141527	59142773	A-1	85	8
chr1	59533861	59535898	A-1	103	10
chr1	60052408	60055054	A-1	130	13
chr1	60164196	60165521	A-1	47	8
chr1	60311816	60312456	A-8	35	6
chr1	61281013	61282056	A-6	98	6
chr1	61287759	61289946	B-4	140	7
chr1	61291533	61292687	A-6	59	6
chr1	61314322	61325985	A-1	377	38
chr1	61962277	61964352	A-1	66	8
chr1	61979912	61983088	A-1	142	8
chr1	62556618	62557904	A-6	113	6
chr1	62673848	62677677	A-1	234	16
chr1	62925739	62929296	A-1	159	8
chr1	63021465	63023630	A-1	74	10
chr1	63554896	63566470	A-6	708	49
chr1	63567680	63569651	C-4	88	8
chr1	63605421	63606862	A-1	95	9
chr1	63759371	63762670	A-1	76	11
chr1	63831110	63833195	A-1	149	10
chr1	64011030	64014245	A-1	193	13
chr1	64707222	64710831	A-6	205	13
chr1	64982132	64984745	A-1	157	7
chr1	65202705	65206131	A-1	175	12
chr1	65240539	65241955	A-1	94	10
chr1	65302569	65307985	A-1	248	12
chr1	65385392	65388187	A-1	227	18
chr1	65491973	65493908	A-1	128	7
chr1	65502880	65504748	A-6	83	12
chr1	65547068	65549200	A-1	112	10
chr1	65655839	65661131	A-1	152	14
chr1	65763353	65766679	A-6	113	7
chr1	66027535	66032382	A-6	146	14
chr1	66226586	66236699	A-2	62	6
chr1	66569031	66575194	A-1	52	6
chr1	66771071	66772572	A-8	75	12
chr1	66990260	66991202	A-6	51	13
chr1	67162108	67164828	A-1	118	14
chr1	67167511	67173304	A-1	136	9
chr1	67288460	67293341	A-1	147	13
chr1	67372898	67373717	A-6	33	6
chr1	67545604	67546704	A-6	90	9
chr1	67665436	67670223	A-1	189	14
chr1	67921016	67926198	A-1	189	13
chr1	68068566	68072385	A-1	174	15
chr1	68284955	68285559	A-5	33	7
chr1	68288128	68290132	A-8	84	21
chr1	68466285	68471388	A-1	160	14
chr1	68733906	68736130	A-1	93	14
chr1	69802312	69809731	A-1	241	20
chr1	70443030	70445501	A-1	86	16
chr1	70459098	70461512	A-1	95	7
chr1	70591191	70593693	A-1	114	14
chr1	70648526	70650647	A-1	76	12
chr1	71284687	71286715	A-6	152	10
chr1	71317545	71320146	A-1	60	10
chr1	72517965	72524511	A-1	175	17
chr1	74433011	74437535	A-1	66	12
chr1	74903005	74915844	A-8	123	13
chr1	74970143	74973150	A-1	64	14
chr1	75362992	75383368	A-6	543	52
chr1	75852537	75855689	C-5	169	15
chr1	75962002	75965224	A-1	125	13
chr1	76023697	76029799	A-1	69	15
chr1	76035092	76035782	A-4	37	6
chr1	76312229	76314419	A-6	82	10
chr1	77105128	77107618	A-6	145	17
chr1	77456474	77458999	A-1	52	8
chr1	77519902	77521713	A-6	139	13
chr1	77918898	77922937	A-1	173	15
chr1	77995315	77998711	A-1	111	6
chr1	78126353	78129272	A-6	94	7
chr1	78213851	78218877	A-1	166	16
chr1	78283155	78285323	A-8	123	12
chr1	78723639	78730911	A-6	116	10
chr1	79244639	79245293	A-8	38	9
chr1	82037382	82043203	A-1	317	21
chr1	84098722	84099907	A-8	62	11
chr1	84236068	84238176	A-1	110	8
chr1	84315569	84317409	A-1	140	10
chr1	84534828	84542010	A-1	126	15
chr1	84717286	84719087	A-1	63	8
chr1	84741351	84746017	A-1	166	20
chr1	84811299	84813985	A-1	86	15
chr1	84927096	84930027	A-1	154	14
chr1	85130719	85132126	A-6	106	8
chr1	85234790	85237064	A-6	160	13
chr1	85285534	85289410	A-1	163	17
chr1	85299793	85300959	A-6	32	8
chr1	85433873	85443065	A-1	262	15
chr1	85496751	85498644	A-1	95	10
chr1	85513338	85516593	A-1	120	10
chr1	85702080	85704181	A-1	156	15
chr1	85814296	85821264	A-1	325	34
chr1	85945232	85946961	A-1	51	8
chr1	86392970	86395458	A-6	152	12
chr1	86632075	86635537	A-8	132	13
chr1	86941676	86945475	A-1	158	12
chr1	87150913	87154880	A-1	175	15
chr1	87369853	87370859	A-1	70	8
chr1	87389750	87390657	A-8	47	7
chr1	87565983	87575975	A-1	391	29
chr1	88700565	88704920	C-4	111	6
chr1	88921131	88924757	A-1	145	13
chr1	89128461	89132205	A-8	112	12
chr1	89229350	89232819	A-1	142	11
chr1	89435847	89437940	A-8	45	9
chr1	89762180	89764106	A-1	138	11
chr1	89870037	89872850	A-6	186	10
chr1	90000183	90002045	A-6	70	8
chr1	90058212	90060766	A-1	179	13
chr1	90080628	90082780	A-6	79	8
chr1	90232614	90235559	A-1	122	11
chr1	90942969	90961081	A-6	626	46
chr1	90961382	90974424	C-4	369	38
chr1	91069386	91074707	A-8	159	14
chr1	91088712	91090470	A-6	128	9
chr1	91258715	91261586	A-1	123	14
chr1	91624967	91625733	A-8	22	6
chr1	91639928	91643079	A-6	87	8
chr1	91738641	91741199	A-1	94	20
chr1	92121681	92125099	A-1	200	19
chr1	92267795	92269497	A-1	92	6
chr1	92318026	92319484	A-1	64	11
chr1	92536162	92538088	A-1	89	12
chr1	92718528	92725243	A-6	505	61
chr1	93021739	93024285	A-1	161	12
chr1	93069575	93073053	A-1	99	9
chr1	93198088	93200756	A-1	190	9
chr1	93316486	93320300	A-1	82	13
chr1	93416300	93419908	A-1	172	22
chr1	93582919	93588635	A-1	147	16
chr1	93684763	93689044	A-1	178	12
chr1	93918348	93920715	A-1	152	8
chr1	94083406	94087299	A-1	240	17
chr1	94116215	94118260	A-1	91	23
chr1	94144237	94148444	A-1	172	13
chr1	94472173	94476508	A-1	153	14
chr1	94482649	94486510	A-1	136	9
chr1	94655172	94658504	A-1	165	13
chr1	94775405	94781768	A-1	173	18
chr1	95057562	95059487	A-1	105	13
chr1	95162489	95166049	A-6	211	16
chr1	95310108	95311724	A-1	67	14
chr1	95354562	95356481	A-1	137	14
chr1	95470917	95472876	A-1	108	15
chr1	96959305	96962317	A-1	118	9
chr1	98154041	98162135	A-1	122	12
chr1	98282325	98292838	A-6	313	30
chr1	98898813	98901749	A-1	128	10
chr1	99242102	99243942	A-6	145	14
chr1	99502091	99503965	A-1	64	10
chr1	100087640	100090015	A-1	89	17
chr1	100207461	100209843	A-1	109	17
chr1	100275083	100278424	A-1	151	14
chr1	100369861	100372739	A-1	100	14
chr1	100486556	100488813	A-1	49	7
chr1	100503580	100505427	A-1	76	11
chr1	100589139	100594097	A-1	168	14
chr1	100775790	100778457	A-6	174	11
chr1	101131581	101135762	A-1	135	16
chr1	101263028	101265512	A-1	59	13
chr1	101473234	101477587	A-6	154	19
chr1	101544856	101555638	A-8	136	7
chr1	102227980	102236336	A-6	91	11
chr1	103344335	103347207	A-6	83	11
chr1	103839586	103843049	A-1	116	12
chr1	107400461	107402460	A-1	135	11
chr1	107483805	107490171	A-6	199	20
chr1	108306946	108310324	A-6	184	11
chr1	108542656	108546031	A-1	130	13
chr1	108903572	108906701	A-1	131	7
chr1	109004598	109005900	A-8	121	8
chr1	109035275	109039855	A-1	123	13
chr1	109090386	109092315	A-1	95	9
chr1	109220530	109223052	A-1	120	7
chr1	109306275	109308516	A-1	116	11
chr1	109384427	109386926	A-1	150	18
chr1	109419340	109420568	A-1	41	9
chr1	109433019	109436866	A-8	136	14
chr1	109443839	109445845	A-1	131	7
chr1	109456042	109461899	A-1	159	16
chr1	109557640	109559919	A-1	88	9
chr1	109593059	109596181	A-1	194	11
chr1	109626136	109628375	A-1	90	9
chr1	109739115	109744068	A-1	184	12
chr1	109769001	109771803	A-1	107	14
chr1	109809695	109811854	A-6	154	8
chr1	109818915	109829337	A-1	190	10
chr1	109837663	109838930	A-1	66	10
chr1	109853303	109854620	A-1	107	10
chr1	109888528	109894369	A-1	118	18
chr1	109963231	109966039	A-1	94	13
chr1	109999606	110000840	A-6	62	11
chr1	110011504	110012829	A-6	50	10
chr1	110031291	110032760	A-8	66	6
chr1	110055880	110056662	A-7	42	10
chr1	110083462	110085308	A-6	102	6
chr1	110254004	110258077	A-1	132	9
chr1	110327680	110330554	A-1	116	16
chr1	110378300	110380121	A-1	89	12
chr1	110411914	110415169	A-8	285	14
chr1	110427351	110429175	A-6	123	9
chr1	110474236	110474942	C-4	47	6
chr1	110494275	110496381	A-6	153	9
chr1	110553478	110557052	A-6	312	14
chr1	110680875	110684871	A-1	224	19
chr1	110750690	110752897	A-1	110	15
chr1	110899066	110901130	B-6	73	6
chr1	110950312	110952630	A-6	170	9
chr1	111018100	111019995	A-6	199	14
chr1	111306891	111308871	A-6	97	19
chr1	111483041	111486677	A-1	127	19
chr1	111543796	111545393	A-8	24	8
chr1	111547236	111549020	A-6	107	10
chr1	111614829	111615880	A-8	57	7
chr1	111689908	111691405	A-6	61	13
chr1	111791241	111794747	A-1	105	15
chr1	111859401	111860704	B-8	55	6
chr1	111963356	111965349	A-1	106	10
chr1	112081162	112085112	A-6	213	16
chr1	112098788	112101035	A-1	119	17
chr1	112332474	112335934	A-1	262	20
chr1	112737774	112741815	A-1	90	9
chr1	112808475	112812393	A-1	69	10
chr1	112851861	112853706	A-6	148	14
chr1	112962016	112966195	A-1	151	18
chr1	113017583	113020216	A-1	123	12
chr1	113048037	113052505	A-1	149	11
chr1	113057340	113061323	A-1	172	14
chr1	113062593	113063366	B-4	44	6
chr1	113066242	113067695	B-8	46	7
chr1	113087241	113088783	C-4	122	7
chr1	113298320	113301927	A-6	173	20
chr1	113416334	113418750	A-1	87	13
chr1	113732311	113737367	A-1	205	13
chr1	114101860	114104442	A-1	127	13
chr1	114154189	114157240	A-1	132	13
chr1	114248327	114250499	A-1	122	12
chr1	114271734	114276553	A-1	152	17
chr1	114322797	114324528	A-8	29	7
chr1	114496148	114505013	A-6	290	24
chr1	114852840	114856752	A-1	211	12
chr1	114924652	114926450	A-1	48	10
chr1	115013292	115015411	A-1	108	16
chr1	115059887	115061493	A-1	47	6
chr1	115098615	115102731	A-1	97	9
chr1	115124340	115125236	A-1	49	9
chr1	115198931	115199698	A-8	47	7
chr1	115433037	115434501	A-6	96	11
chr1	115681171	115682832	A-6	112	11
chr1	115985620	115987683	A-1	152	7
chr1	116172158	116173169	C-4	83	7
chr1	116181838	116188580	A-6	257	20
chr1	116319945	116322181	A-1	122	12
chr1	116453320	116457085	A-8	49	6
chr1	116511643	116513229	C-4	87	9
chr1	116716054	116722584	A-1	236	15
chr1	116762032	116763688	A-1	83	11
chr1	116914037	116915880	A-1	132	12
chr1	117010249	117012340	A-1	140	9
chr1	117253520	117256929	A-1	171	12
chr1	117402058	117405233	A-1	111	9
chr1	117464928	117467004	A-1	131	11
chr1	117553257	117556016	A-3	28	7
chr1	117707329	117714619	A-1	226	10
chr1	117948664	117953344	A-1	173	17
chr1	118272754	118275445	A-1	114	19
chr1	118528781	118529874	A-6	43	10
chr1	119323152	119325001	B-6	86	6
chr1	119326663	119334592	A-8	382	46
chr1	119336055	119338126	C-6	93	10
chr1	119342235	119347594	A-6	162	20
chr1	119349346	119354944	C-4	217	16
chr1	119483422	119485497	A-1	78	12
chr1	119975504	119976865	A-6	48	6
chr1	119991044	119993162	A-1	122	9
chr1	120055364	120058143	A-1	107	11
chr1	120411211	120414970	A-1	156	8
chr1	120637011	120641392	A-1	283	10
chr1	120705591	120708252	A-8	127	6
chr1	120961849	120963328	A-6	94	10
chr1	141521932	141640162	A-8	1020	13
chr1	142073452	142124730	A-3	696	10
chr1	142305159	142314365	A-8	131	7
chr1	143229254	143233297	A-1	175	7
chr1	143243341	143246738	A-7	81	6
chr1	143304410	143306789	A-1	116	7
chr1	143640640	143644550	A-1	155	16
chr1	143750235	143752140	A-1	70	7
chr1	143807592	143808588	A-1	45	11
chr1	143919716	143923261	A-1	160	6
chr1	144105703	144111213	C-5	209	9
chr1	144148171	144153610	A-6	92	19
chr1	144181171	144186624	A-6	228	25
chr1	144188043	144189643	A-1	63	12
chr1	144218151	144220103	A-1	80	13
chr1	144226002	144228709	A-1	106	14
chr1	144259905	144261979	A-1	58	9
chr1	144285291	144288055	A-1	139	8
chr1	144299983	144301708	A-1	72	8
chr1	144320936	144323781	A-1	138	14
chr1	144437770	144439451	A-8	25	6
chr1	145015144	145020516	A-6	255	16
chr1	145021862	145023921	A-6	99	8
chr1	145108906	145111884	A-1	149	12
chr1	145162915	145165055	A-1	58	6
chr1	145180116	145182770	A-1	127	19
chr1	145479281	145483847	A-6	65	7
chr1	145537093	145540001	A-1	154	7
chr1	145607939	145609915	A-1	95	14
chr1	145866512	145868415	A-1	86	7
chr1	146184357	146185804	A-6	78	8
chr1	146201738	146204220	A-1	99	9
chr1	146247662	146249336	A-8	70	9
chr1	146256196	146257659	A-8	77	7
chr1	146267695	146268547	A-7	52	6
chr1	146270949	146276282	A-1	88	8
chr1	146466091	146467820	A-1	86	6
chr1	146821939	146824677	A-1	122	7
chr1	147109349	147156306	A-1	613	18
chr1	147178278	147220558	A-3	463	11
chr1	147402124	147428791	A-1	594	43
chr1	147428864	147463870	A-8	550	23
chr1	147489133	147499475	A-1	228	18
chr1	147552441	147554901	A-8	139	9
chr1	147664307	147667614	A-6	148	8
chr1	147937663	147940836	A-8	175	6
chr1	148030175	148032461	A-1	112	6
chr1	148048410	148052464	A-6	150	8
chr1	148081432	148084501	A-1	56	6
chr1	148121551	148127775	A-1	236	28
chr1	148137391	148138506	A-6	73	7
chr1	148165343	148166920	A-1	60	7
chr1	148174545	148176172	A-6	31	8
chr1	148245298	148250448	A-1	120	13
chr1	148303986	148308203	A-1	89	11
chr1	148387745	148390794	A-1	224	14
chr1	148472366	148476231	A-6	175	24
chr1	148494387	148500878	A-8	81	8
chr1	148506753	148508749	A-1	88	13
chr1	148519085	148522351	A-6	106	12
chr1	148532515	148533896	A-1	68	12
chr1	148560045	148561657	A-1	77	7
chr1	148602130	148606635	A-1	149	20
chr1	148725775	148727430	A-1	52	10
chr1	148787477	148789589	A-1	148	13
chr1	148799108	148804253	A-1	94	10
chr1	148813623	148819564	A-1	182	18
chr1	148867200	148869780	A-1	101	17
chr1	148934850	148937046	A-1	29	6
chr1	149113641	149116816	A-1	111	10
chr1	149164009	149166235	A-8	103	11
chr1	149208903	149214533	A-1	213	14
chr1	149240809	149248645	A-1	154	21
chr1	149286549	149288255	A-1	83	9
chr1	149296635	149300603	A-1	103	18
chr1	149309105	149311743	A-1	116	12
chr1	149370149	149372626	A-8	215	7
chr1	149384221	149386627	A-6	142	14
chr1	149403299	149406160	A-1	87	19
chr1	149427952	149429845	A-1	78	8
chr1	149433858	149440054	A-8	228	17
chr1	149493289	149495172	A-1	78	8
chr1	149520036	149523469	A-1	184	13
chr1	149564679	149567891	A-1	96	12
chr1	149585316	149587095	A-1	54	9
chr1	149610455	149612439	A-8	33	7
chr1	149638069	149639624	A-1	87	8
chr1	149696287	149698682	A-1	196	9
chr1	149748890	149754171	A-1	145	8
chr1	149778665	149782083	A-1	98	11
chr1	149850198	149852918	A-1	145	17
chr1	149955143	149958073	A-6	62	9
chr1	149959447	149961206	A-6	63	10
chr1	150001545	150003829	A-1	87	15
chr1	150028723	150031127	A-1	123	12
chr1	150074825	150079506	A-8	232	15
chr1	150147493	150149631	A-1	95	10
chr1	150227386	150233863	A-1	180	11
chr1	150273145	150276543	A-1	90	15
chr1	150346440	150352366	A-6	400	14
chr1	150427701	150432703	A-6	85	9
chr1	150453899	150458541	B-3	175	6
chr1	150754093	150756761	A-6	73	8
chr1	150861922	150862835	A-8	38	8
chr1	150921585	150925652	A-2	28	6
chr1	150926192	150938811	A-3	86	7
chr1	151222166	151225871	A-8	23	6
chr1	151274598	151284861	A-8	55	6
chr1	151288202	151300960	A-8	61	6
chr1	151441122	151444970	A-5	33	9
chr1	151499739	151502221	A-6	141	6
chr1	151587037	151593033	A-8	70	6
chr1	151596270	151598183	A-2	26	9
chr1	151629093	151630709	A-8	24	6
chr1	151774378	151776037	A-6	59	14
chr1	151802509	151808373	A-7	109	13
chr1	151847135	151853010	A-8	86	9
chr1	151854411	151856989	A-3	30	6
chr1	151865266	151867489	A-1	48	11
chr1	151872516	151875089	A-1	123	18
chr1	151897506	151898990	A-1	69	8
chr1	151908820	151911598	A-1	94	13
chr1	151916316	151919683	A-6	198	17
chr1	151966501	151968705	A-1	80	12
chr1	152012395	152015836	A-1	144	16
chr1	152022178	152023291	C-5	65	6
chr1	152028675	152030479	A-7	47	6
chr1	152159036	152163214	A-1	161	16
chr1	152184044	152186204	A-1	137	10
chr1	152196010	152198356	A-1	100	13
chr1	152200950	152203940	A-1	108	8
chr1	152205482	152208377	A-1	103	14
chr1	152215300	152217817	A-1	112	10
chr1	152223679	152226564	A-1	69	7
chr1	152229460	152230974	A-1	49	7
chr1	152419255	152423062	A-1	103	9
chr1	152429287	152434417	A-8	35	11
chr1	152458465	152461357	A-1	146	16
chr1	152510840	152512661	A-1	69	12
chr1	152562801	152566144	A-6	131	16
chr1	152566740	152568909	A-1	89	7
chr1	152643927	152647939	A-1	135	17
chr1	152740276	152742258	A-6	197	10
chr1	152795031	152799328	A-1	162	15
chr1	152805189	152808082	A-1	87	11
chr1	152845736	152848418	A-1	113	9
chr1	152865509	152869351	A-1	90	11
chr1	152999369	153000339	B-6	72	6
chr1	153106120	153109746	A-6	108	11
chr1	153175036	153177487	A-1	114	15
chr1	153193853	153196079	A-1	32	7
chr1	153199756	153202344	A-1	134	9
chr1	153208297	153215841	A-1	231	25
chr1	153221701	153224171	A-1	65	11
chr1	153237854	153248361	A-1	360	22
chr1	153288616	153293176	A-1	194	12
chr1	153301726	153304241	A-6	128	16
chr1	153309467	153310668	A-8	78	7
chr1	153316240	153325836	A-1	483	32
chr1	153364461	153369912	A-1	234	17
chr1	153373505	153376088	A-1	124	12
chr1	153378466	153380359	A-1	88	9
chr1	153411366	153414264	A-6	136	23
chr1	153426782	153432284	A-6	286	22
chr1	153443269	153446337	A-1	110	16
chr1	153463137	153464628	A-1	72	10
chr1	153479949	153481782	A-1	95	13
chr1	153489748	153492634	A-1	119	11
chr1	153497518	153499549	A-1	62	15
chr1	153508719	153510716	A-1	111	12
chr1	153513501	153515486	A-1	106	13
chr1	153544636	153546609	A-1	75	14
chr1	153556246	153562138	A-1	320	31
chr1	153796544	153801363	A-1	207	13
chr1	153845816	153847776	A-1	99	9
chr1	153922912	153927512	A-1	211	15
chr1	153981371	153983154	A-1	92	9
chr1	154092806	154094798	A-1	68	8
chr1	154095230	154100133	A-1	99	15
chr1	154146322	154148334	A-1	52	6
chr1	154168379	154171540	A-1	92	16
chr1	154176678	154178213	A-7	19	6
chr1	154210396	154217354	A-1	165	12
chr1	154256219	154257747	A-1	60	7
chr1	154289075	154292256	A-1	182	17
chr1	154316749	154320074	A-1	167	12
chr1	154349899	154367072	A-8	311	23
chr1	154388791	154391073	A-8	27	6
chr1	154429502	154431136	A-1	82	10
chr1	154448859	154450367	A-1	84	10
chr1	154483474	154484964	A-7	29	7
chr1	154517782	154521907	A-1	104	17
chr1	154527729	154528743	A-7	38	6
chr1	154572871	154575627	A-1	118	14
chr1	154604329	154606034	A-8	63	9
chr1	154624384	154625631	A-6	87	11
chr1	154656258	154659626	A-6	174	11
chr1	154671920	154674071	A-6	153	8
chr1	154692297	154694897	A-1	121	8
chr1	154724462	154727800	A-8	40	6
chr1	154734307	154738488	A-1	188	12
chr1	154739153	154742112	C-5	70	6
chr1	154807491	154809301	A-1	51	6
chr1	154827278	154828927	A-1	80	9
chr1	154836955	154838505	A-1	61	13
chr1	154859214	154863529	A-6	216	10
chr1	154877710	154879371	A-6	90	7
chr1	154887725	154894641	A-1	131	10
chr1	154896024	154899128	A-6	73	9
chr1	154911685	154915246	A-6	157	14
chr1	154938850	154945172	A-1	196	15
chr1	154962041	154966089	A-1	157	20
chr1	154976632	154978310	A-1	54	11
chr1	154982549	154990069	A-1	261	21
chr1	155002167	155006251	A-1	121	14
chr1	155049885	155050820	A-6	65	6
chr1	155081184	155082741	A-8	89	7
chr1	155095065	155097849	A-6	182	11
chr1	155128330	155132076	A-8	149	9
chr1	155143707	155145315	A-4	81	6
chr1	155156449	155157504	A-6	79	8
chr1	155163685	155166256	A-1	90	7
chr1	155280753	155283358	A-1	174	8
chr1	155371682	155375833	A-1	146	11
chr1	155929517	155937700	A-5	61	7
chr1	156226322	156233339	A-6	159	12
chr1	156349519	156350533	C-4	64	6
chr1	156385523	156386743	B-4	42	6
chr1	156413409	156415852	A-1	59	6
chr1	156416824	156418162	A-6	77	8
chr1	156520412	156530656	A-3	52	7
chr1	156585717	156610865	A-3	202	7
chr1	156942753	156959082	A-3	84	6
chr1	156973261	157016949	A-3	323	13
chr1	157145470	157180643	A-3	195	8
chr1	157239670	157247745	A-5	92	7
chr1	157313001	157313920	A-3	16	7
chr1	157404604	157430189	A-1	281	18
chr1	157436219	157453870	A-8	216	13
chr1	157765493	157782604	A-8	108	6
chr1	157823569	157856998	A-8	215	6
chr1	157950027	157957349	A-5	47	8
chr1	158015509	158018326	A-1	103	9
chr1	158090171	158091797	A-1	103	9
chr1	158136232	158137938	A-8	44	9
chr1	158159112	158162650	A-1	126	15
chr1	158180010	158183190	A-1	90	8
chr1	158266377	158269616	A-1	106	12
chr1	158306188	158307844	A-6	77	13
chr1	158314857	158321030	A-6	149	13
chr1	158332967	158335907	A-1	113	19
chr1	158440044	158443517	A-1	109	8
chr1	158497000	158499681	A-1	91	14
chr1	158520371	158522186	A-1	61	6
chr1	158577409	158580685	A-1	85	17
chr1	158635986	158638767	A-6	122	17
chr1	158947472	158951349	A-8	28	6
chr1	159255734	159259155	A-1	105	11
chr1	159274120	159275733	A-8	78	12
chr1	159281362	159283631	A-1	79	12
chr1	159321623	159326369	A-8	57	7
chr1	159333044	159335986	A-6	90	15
chr1	159353603	159356548	A-1	96	15
chr1	159367758	159370585	A-1	112	9
chr1	159389411	159391755	A-1	76	11
chr1	159395154	159396851	A-1	85	13
chr1	159401555	159403917	A-1	96	14
chr1	159412895	159414527	A-1	74	9
chr1	159433348	159439576	A-6	145	22
chr1	159461756	159464438	A-1	56	9
chr1	159494736	159495921	A-6	69	7
chr1	159550097	159551586	A-1	77	12
chr1	159625680	159627353	A-1	109	6
chr1	159634270	159637167	A-1	130	10
chr1	159760244	159761840	A-6	134	6
chr1	159764707	159768578	C-5	119	7
chr1	159775930	159777325	C-5	54	6
chr1	159846349	159849725	A-1	108	8
chr1	159962211	159964251	A-1	164	12
chr1	159985363	159987402	A-1	86	10
chr1	159999620	160003369	A-1	96	10
chr1	160259681	160261156	A-1	105	14
chr1	160305641	160309480	A-1	152	11
chr1	160733891	160735535	A-1	75	10
chr1	160796620	160799577	A-1	144	14
chr1	160868428	160871051	A-7	29	6
chr1	161026506	161029435	A-1	73	6
chr1	161056364	161059928	A-6	57	6
chr1	161295445	161306953	A-8	74	6
chr1	161557341	161559550	A-1	77	10
chr1	162554699	162557730	C-4	75	8
chr1	162793309	162801842	A-1	104	9
chr1	163471013	163472496	B-6	95	15
chr1	163584328	163593057	A-6	365	28
chr1	163679403	163681325	A-6	53	10
chr1	163777854	163780522	A-8	30	9
chr1	163866074	163868958	A-1	127	11
chr1	163931836	163934924	A-1	91	12
chr1	164004015	164005896	A-1	68	14
chr1	164062757	164066027	A-1	179	12
chr1	164368224	164435473	A-3	680	26
chr1	165074434	165077313	A-1	168	9
chr1	165111041	165112849	A-1	104	16
chr1	165119879	165120584	B-6	48	6
chr1	165156309	165157317	A-8	117	6
chr1	165208020	165216720	A-1	155	8
chr1	165357115	165358007	B-6	57	7
chr1	165455125	165459087	A-1	247	12
chr1	165674758	165675831	A-6	59	7
chr1	165690444	165692181	B-4	122	8
chr1	165788688	165790393	A-1	114	12
chr1	165865465	165867025	A-6	79	8
chr1	165949242	165952887	C-5	166	13
chr1	165956862	165959598	A-1	123	16
chr1	166169189	166174949	A-1	180	25
chr1	166370961	166373549	A-1	168	11
chr1	166414347	166416508	A-1	81	13
chr1	166461147	166465501	A-1	141	16
chr1	167340648	167347161	A-1	241	12
chr1	167603119	167605230	A-1	73	17
chr1	167662292	167663603	A-6	40	9
chr1	167718229	167723107	A-1	139	19
chr1	167822069	167822861	A-6	18	6
chr1	168029635	168031976	A-1	69	10
chr1	168126802	168130762	A-1	130	14
chr1	168308869	168313643	A-1	68	9
chr1	168371493	168384162	A-3	68	7
chr1	168503820	168527363	A-3	126	7
chr1	168766496	168768949	A-1	74	7
chr1	168896689	168903015	A-8	270	20
chr1	168903474	168909447	A-7	120	8
chr1	169720566	169724695	A-1	86	11
chr1	169976927	169979590	A-1	108	12
chr1	170016511	170018605	A-1	99	10
chr1	170076679	170079090	A-6	134	14
chr1	170379096	170381450	A-7	26	6
chr1	170679305	170680115	A-1	44	9
chr1	170765889	170771486	A-1	146	13
chr1	171710673	171715084	A-1	168	15
chr1	171904230	171906823	A-8	57	11
chr1	171949599	171951824	A-1	60	13
chr1	172059099	172061971	A-8	147	19
chr1	172100150	172106509	A-1	155	29
chr1	172254398	172259890	A-1	162	8
chr1	172394084	172396469	A-1	142	9
chr1	173233939	173237486	A-1	166	22
chr1	173257417	173259484	A-1	48	10
chr1	173424845	173429926	A-1	104	20
chr1	173776504	173825443	A-3	292	6
chr1	173834807	173852929	A-3	160	6
chr1	174440510	174444112	A-1	180	12
chr1	175399491	175401229	A-6	76	8
chr1	175405867	175408189	A-6	64	10
chr1	176328707	176331599	A-1	148	15
chr1	176777379	176779416	A-1	112	11
chr1	176960397	176964291	A-1	208	12
chr1	177261109	177263520	A-1	171	10
chr1	177317134	177319173	A-1	117	12
chr1	177464293	177466236	A-1	119	11
chr1	177529044	177530478	A-1	87	13
chr1	177600955	177602639	A-1	80	7
chr1	177811214	177812619	A-6	87	13
chr1	177827253	177828345	A-1	82	8
chr1	177977692	177980663	A-6	225	19
chr1	178111803	178114804	A-1	55	11
chr1	178116920	178120340	A-1	131	15
chr1	178189500	178192564	A-1	112	12
chr1	178389546	178394793	A-1	176	12
chr1	178462751	178476081	A-6	613	37
chr1	178737302	178739309	A-1	114	11
chr1	178867512	178870689	A-1	94	10
chr1	179147607	179149476	A-6	166	10
chr1	179189001	179190392	A-6	108	6
chr1	179256812	179259163	A-1	92	10
chr1	179322706	179328273	A-1	259	17
chr1	179339937	179343764	C-5	165	9
chr1	179552370	179556910	C-4	128	9
chr1	179717695	179720171	A-6	146	12
chr1	179720786	179727879	B-4	95	7
chr1	180264932	180266302	A-1	73	6
chr1	180623832	180628547	A-1	224	18
chr1	180838497	180840686	A-1	67	12
chr1	180849935	180852906	A-1	116	8
chr1	181024740	181026214	A-1	98	8
chr1	181074432	181078718	A-1	190	15
chr1	181257071	181262967	A-1	229	12
chr1	181421400	181424765	A-6	53	10
chr1	181652435	181654816	A-6	132	13
chr1	181704963	181709274	A-1	198	13
chr1	181867331	181872931	A-1	150	14
chr1	182271685	182273696	A-6	152	13
chr1	182286885	182288813	A-1	72	8
chr1	182621852	182625509	A-1	179	8
chr1	182988840	182992633	A-1	163	14
chr1	183207818	183211180	A-1	127	12
chr1	183280411	183283234	A-1	158	9
chr1	183391039	183394786	A-1	129	21
chr1	183549826	183554008	A-1	196	14
chr1	183968245	183973836	A-1	90	15
chr1	184609407	184612767	A-1	119	16
chr1	184915075	184919033	A-6	88	15
chr1	188706553	188732604	A-8	208	14
chr1	191042780	191045571	A-6	113	13
chr1	191293710	191296933	A-1	148	15
chr1	191339997	191341872	A-1	108	17
chr1	191356879	191359271	A-1	123	11
chr1	194843116	194858165	A-8	131	9
chr1	195111923	195134509	A-8	192	6
chr1	195380450	195383149	A-1	90	14
chr1	195433060	195438026	A-1	113	10
chr1	196008793	196012550	A-1	133	13
chr1	196137900	196139296	A-1	101	9
chr1	196143382	196157466	A-6	519	48
chr1	196391844	196396396	A-1	206	12
chr1	198269467	198272870	B-6	140	16
chr1	198274025	198279970	A-6	292	26
chr1	198537378	198539004	C-5	65	9
chr1	198644873	198647543	A-1	117	10
chr1	198855352	198858381	A-1	110	9
chr1	198904280	198906480	A-1	109	9
chr1	198974062	198978816	A-1	160	8
chr1	199108819	199109990	A-8	126	6
chr1	199126530	199129539	A-1	99	8
chr1	199258598	199260224	A-1	124	12
chr1	199349559	199351035	A-6	116	6
chr1	199389164	199390696	A-1	68	9
chr1	199406307	199407567	A-1	75	6
chr1	199518648	199521684	A-8	124	13
chr1	199634394	199636145	A-1	102	10
chr1	199700851	199705635	A-1	179	12
chr1	199715781	199718918	A-6	118	7
chr1	199737636	199743395	A-6	136	13
chr1	199773759	199776763	C-5	152	9
chr1	199883386	199887278	A-6	232	16
chr1	199974869	199976971	A-1	98	12
chr1	200064344	200066390	A-1	72	8
chr1	200123918	200125675	A-6	84	12
chr1	200179782	200184132	A-6	68	10
chr1	200190422	200192791	A-1	92	11
chr1	200217827	200219780	A-1	128	10
chr1	200243101	200250245	A-8	153	14
chr1	200358487	200358981	A-8	18	9
chr1	200378567	200381569	A-1	174	11
chr1	200428686	200430465	A-6	91	6
chr1	200448797	200450783	A-6	74	8
chr1	200576693	200580053	A-1	83	9
chr1	200584063	200585819	A-1	77	9
chr1	200878124	200881263	A-6	163	9
chr1	200943723	200946714	A-6	117	11
chr1	201040610	201044883	A-1	195	13
chr1	201045484	201048574	A-1	129	10
chr1	201096292	201099118	A-1	118	11
chr1	201123657	201125332	A-1	101	12
chr1	201162232	201163589	A-1	72	8
chr1	201192714	201195443	A-1	111	15
chr1	201201943	201205239	A-1	109	12
chr1	201241952	201244655	A-1	119	11
chr1	201261794	201263507	A-1	100	7
chr1	201362074	201364562	A-1	80	12
chr1	201422288	201423387	A-8	20	7
chr1	201506651	201509440	A-1	63	7
chr1	201540687	201545566	A-1	154	11
chr1	201562324	201563983	C-5	82	7
chr1	201586101	201587834	A-8	23	6
chr1	201722757	201724037	B-4	60	6
chr1	201861202	201865993	A-6	134	19
chr1	202030770	202032830	A-1	82	11
chr1	202095909	202098403	A-1	93	12
chr1	202308186	202311437	A-1	255	11
chr1	202384127	202388697	A-6	179	13
chr1	202449357	202450483	A-1	44	11
chr1	202595158	202596306	A-8	24	9
chr1	202612962	202617131	A-1	108	8
chr1	202641960	202648331	A-1	154	20
chr1	202728319	202731933	A-1	129	7
chr1	202751578	202753052	A-1	71	9
chr1	202919596	202922707	A-1	154	11
chr1	203062956	203067610	A-6	100	7
chr1	203277914	203279992	A-6	69	7
chr1	203356992	203358612	A-1	60	12
chr1	203446035	203447884	A-1	115	13
chr1	203461899	203466324	A-1	175	12
chr1	203556486	203557838	A-1	88	9
chr1	203689349	203695033	A-6	204	15
chr1	203739844	203742022	A-6	84	10
chr1	203800861	203806124	A-6	158	11
chr1	203826388	203828240	A-1	53	9
chr1	203865684	203869299	A-1	177	13
chr1	203914958	203917097	A-1	135	13
chr1	203982015	203986459	A-1	145	10
chr1	204010028	204012330	A-1	79	12
chr1	204047387	204050066	A-1	126	13
chr1	204085396	204086086	A-7	38	6
chr1	204301455	204306421	A-1	291	7
chr1	204389672	204390957	A-6	75	9
chr1	204709233	204711448	A-1	34	6
chr1	204746741	204748471	A-6	149	10
chr1	204795270	204798490	A-1	100	19
chr1	204851412	204853136	A-1	62	9
chr1	204873600	204876977	A-1	142	11
chr1	204924143	204930813	A-1	227	15
chr1	205103608	205106917	A-8	46	7
chr1	205148616	205150389	A-1	94	6
chr1	205289216	205291785	A-6	83	12
chr1	205292341	205293829	A-1	77	13
chr1	205560568	205563581	A-1	113	12
chr1	205688571	205696740	A-1	131	15
chr1	205735738	205744142	A-8	143	13
chr1	205884252	205885574	A-6	74	12
chr1	205909109	205915361	A-8	105	6
chr1	205989294	205998020	A-1	149	14
chr1	206103370	206109815	A-1	166	12
chr1	206147685	206151565	A-8	100	11
chr1	206482986	206486368	A-1	214	13
chr1	207667291	207676821	A-8	102	15
chr1	207886825	207896299	A-7	80	10
chr1	207914594	207916126	A-6	86	11
chr1	207987576	207988309	C-5	38	6
chr1	208023626	208024966	A-1	61	13
chr1	208041026	208046820	A-8	98	16
chr1	208067359	208069021	A-1	92	12
chr1	208175446	208182031	A-6	172	11
chr1	208471729	208474596	A-1	199	16
chr1	208568100	208570549	A-1	130	11
chr1	209372494	209374847	A-6	118	10
chr1	209497034	209501605	A-1	232	18
chr1	209566270	209568252	A-1	112	9
chr1	209621954	209623972	A-1	72	12
chr1	209815580	209820221	A-1	242	13
chr1	209914356	209916285	A-1	80	11
chr1	210069121	210071427	A-1	168	15
chr1	210274428	210277714	A-1	114	18
chr1	210523546	210528270	A-1	238	13
chr1	210653810	210655223	A-1	101	12
chr1	210672324	210673751	A-1	98	6
chr1	210842700	210850088	A-1	294	21
chr1	210935919	210943340	A-1	250	14
chr1	211030548	211033334	A-1	109	17
chr1	211097162	211099354	A-1	132	10
chr1	211190058	211192709	A-6	148	14
chr1	211254396	211256502	A-1	97	13
chr1	211290577	211292015	A-1	64	10
chr1	212219739	212220857	B-4	56	6
chr1	212222133	212231060	A-6	360	31
chr1	212424955	212429692	C-5	83	6
chr1	212520210	212522982	A-1	162	8
chr1	212788407	212792785	A-1	181	19
chr1	212842454	212844974	A-1	94	14
chr1	213245175	213246713	A-8	19	6
chr1	213321568	213323951	A-6	157	14
chr1	213806662	213811614	A-1	149	8
chr1	214840409	214841909	B-4	63	7
chr1	214933570	214964967	A-3	260	6
chr1	215153912	215207881	A-5	390	6
chr1	215327912	215330914	A-1	83	9
chr1	215373426	215380629	A-8	359	31
chr1	215870174	215872004	A-1	57	10
chr1	216403824	216407184	C-5	177	8
chr1	216524303	216526465	A-1	82	13
chr1	216584939	216591824	A-1	180	18
chr1	217412959	217415175	A-1	67	9
chr1	218167687	218168905	A-6	123	11
chr1	218285088	218287161	A-1	99	11
chr1	218328582	218330718	A-1	70	11
chr1	218333471	218335042	A-1	89	7
chr1	218511375	218514632	A-1	72	11
chr1	218767039	218770185	A-1	188	11
chr1	218929829	218931650	A-1	125	13
chr1	218987689	218988988	A-1	93	14
chr1	219026181	219027843	A-1	115	9
chr1	219117739	219121778	A-6	228	26
chr1	219122287	219124122	A-4	34	6
chr1	219126931	219136401	A-8	349	32
chr1	219980463	219983692	A-1	199	16
chr1	220704903	220705971	A-1	56	7
chr1	220828820	220830460	A-1	55	11
chr1	220856649	220859715	A-1	155	14
chr1	220950440	220954245	A-1	162	18
chr1	221054448	221056128	A-1	85	6
chr1	221382627	221384447	A-1	77	13
chr1	221602267	221605804	A-1	226	12
chr1	221632749	221633984	A-1	75	11
chr1	221955053	221955995	A-7	17	6
chr1	221965645	221970123	A-6	163	12
chr1	222003088	222004155	A-8	66	6
chr1	222098984	222101421	A-1	194	10
chr1	222367887	222369993	A-1	75	12
chr1	222436361	222438818	A-1	177	10
chr1	222580738	222585555	A-1	103	12
chr1	222610927	222612813	A-1	93	13
chr1	222685178	222690543	A-1	177	17
chr1	222869928	222873033	A-6	213	15
chr1	223183570	223185242	A-1	102	8
chr1	223679606	223683610	A-1	227	13
chr1	223903627	223909030	A-1	254	10
chr1	224031199	224033760	A-1	92	13
chr1	224063996	224066196	A-1	122	11
chr1	224134066	224137939	A-1	167	17
chr1	224177891	224179267	A-1	111	9
chr1	224252175	224254499	A-1	103	11
chr1	224315398	224321208	A-1	273	17
chr1	224337045	224338534	A-1	113	7
chr1	224363235	224365831	C-5	162	11
chr1	224375474	224377430	A-1	196	6
chr1	224439214	224441603	A-1	100	13
chr1	224477569	224478729	A-6	120	11
chr1	224562280	224564661	A-1	158	18
chr1	224660298	224662855	A-1	116	10
chr1	224802006	224805170	A-1	205	15
chr1	224956699	224958331	A-1	72	6
chr1	224990126	224994286	A-6	259	19
chr1	225081714	225083119	B-6	50	9
chr1	225124405	225125994	A-1	113	8
chr1	225193106	225195433	A-1	148	10
chr1	225568516	225573797	A-1	183	13
chr1	225817640	225818727	A-1	42	9
chr1	225982162	225984138	A-1	75	11
chr1	225988179	225991069	A-1	152	12
chr1	226041246	226043607	C-5	164	9
chr1	226140865	226142342	C-4	71	7
chr1	226199567	226203584	A-1	275	13
chr1	226257986	226263992	A-6	322	18
chr1	226312951	226315592	B-6	145	8
chr1	226335650	226339433	A-1	230	16
chr1	226355897	226359016	A-1	230	13
chr1	226362607	226364734	A-1	97	11
chr1	226393895	226396777	A-1	185	18
chr1	226403411	226404399	A-7	21	7
chr1	226419348	226421275	A-1	129	11
chr1	226466661	226468756	A-6	194	9
chr1	226529682	226531155	A-6	117	8
chr1	226625382	226627486	A-8	91	7
chr1	226632309	226634051	B-4	126	9
chr1	226659362	226662303	A-1	163	16
chr1	226670269	226672365	A-6	99	11
chr1	226699626	226701406	C-4	86	8
chr1	226709910	226714262	A-1	199	29
chr1	226717608	226719939	A-6	113	12
chr1	226723629	226725438	C-4	70	7
chr1	226740398	226743155	A-1	214	11
chr1	226936844	226940578	A-1	206	17
chr1	227473082	227475584	A-1	135	9
chr1	227543557	227546759	A-1	234	12
chr1	227609193	227610528	C-4	85	6
chr1	227633114	227638020	A-6	296	27
chr1	227709164	227711504	A-1	83	14
chr1	227759656	227762233	A-1	204	7
chr1	227826989	227830343	A-1	200	11
chr1	228268685	228271993	A-1	236	13
chr1	228626266	228629630	A-1	273	9
chr1	228843920	228846597	A-1	102	9
chr1	229069067	229071793	A-1	159	15
chr1	229179630	229182494	A-1	159	13
chr1	229240635	229244243	A-1	226	12
chr1	229363103	229366629	A-6	292	18
chr1	229442576	229445404	A-1	87	17
chr1	229536401	229544093	A-1	246	27
chr1	229621020	229626047	A-1	266	8
chr1	229730218	229732091	A-1	79	13
chr1	229828310	229831046	A-1	105	10
chr1	230829673	230833877	A-1	226	8
chr1	231007283	231008580	A-6	78	8
chr1	231152219	231154490	A-1	68	13
chr1	231497307	231499546	A-1	72	10
chr1	231529091	231531551	A-1	219	12
chr1	231815429	231818851	A-1	162	13
chr1	232106524	232108496	A-6	167	8
chr1	232414956	232418076	A-6	102	12
chr1	232573394	232576803	A-1	89	16
chr1	232679785	232682029	A-1	188	14
chr1	232733479	232735300	A-7	41	6
chr1	232801333	232816603	A-1	626	34
chr1	233323059	233324282	C-5	46	7
chr1	233333945	233335509	C-5	52	8
chr1	233357027	233359277	A-1	111	14
chr1	233390059	233391968	A-1	81	10
chr1	233554866	233561074	A-1	253	16
chr1	233596637	233598261	A-1	59	11
chr1	233732444	233736416	A-1	221	14
chr1	233878381	233881186	A-6	264	22
chr1	234095223	234098156	A-1	153	10
chr1	234293728	234296152	A-6	179	14
chr1	234370909	234373797	A-1	225	18
chr1	234510536	234512775	A-1	140	14
chr1	234623902	234626982	A-6	144	15
chr1	234752634	234755356	A-1	101	16
chr1	234833337	234835237	A-1	84	14
chr1	234916011	234921394	A-8	174	10
chr1	235024783	235026553	A-1	117	17
chr1	235226892	235237850	A-3	167	6
chr1	235271301	235292264	A-1	389	12
chr1	235900148	236018471	A-3	987	10
chr1	236056854	236125175	A-3	615	18
chr1	237561896	237650226	A-3	920	18
chr1	238129060	238157484	A-3	309	11
chr1	238215293	238246864	A-3	424	9
chr1	238270374	238389540	A-3	1510	23
chr1	238570219	238636349	A-2	575	7
chr1	238662585	238728500	A-2	805	17
chr1	238755727	238913714	A-2	1856	23
chr1	239036030	239082123	A-3	463	8
chr1	239216875	239318890	A-2	896	6
chr1	239561728	239638752	A-3	711	13
chr1	239652329	239654693	A-6	89	7
chr1	239748356	239750731	A-1	109	8
chr1	239867547	239870812	A-1	149	13
chr1	240077547	240079512	A-1	93	14
chr1	240705112	240880207	A-8	1578	21
chr1	241114419	241135261	C-3	231	7
chr1	241483026	241486937	A-1	175	17
chr1	241712585	241713627	A-8	74	6
chr1	242044769	242095083	A-8	597	21
chr1	242134787	242176917	A-3	555	21
chr1	242209556	242275934	B-3	684	7
chr1	242276869	242301833	A-8	545	31
chr1	242303005	242387486	A-5	1031	12
chr1	242679822	242682570	A-1	141	12
chr1	242690666	242691799	A-1	69	9
chr1	242882064	242884938	A-1	135	11
chr1	242959389	242961014	C-5	128	8
chr1	243063393	243067831	A-1	181	16
chr1	243089237	243095774	A-1	299	20
chr1	243198482	243202467	A-1	207	12
chr1	243378855	243387651	A-1	413	23
chr1	243570605	243594596	A-2	405	8
chr1	243594843	243609346	A-2	251	8
chr1	243775117	243816604	B-1	681	19
chr1	243837341	243846279	A-2	167	6
chr1	244736222	244737721	A-1	105	11
chr1	244794546	244797907	A-1	156	15
chr1	244953185	244955688	A-6	140	10
chr1	245159907	245162740	A-1	203	11
chr1	245236876	245238463	A-1	87	10
chr1	245307527	245309994	A-1	95	10
chr1	245333232	245335374	A-1	106	10
chr1	245340666	245342719	A-1	180	14
chr1	245439307	245441553	A-1	67	7
chr1	245560565	245563423	A-1	234	15
chr1	245637164	245694899	A-3	813	35
chr1	245732338	245748562	A-3	184	13
chr1	245752142	245784103	A-3	366	24
chr1	245811400	245837598	A-3	215	7
chr1	245839119	245870260	A-8	261	9
chr1	246022969	246050780	A-3	138	6
chr1	246052238	246085114	A-2	389	9
chr1	246086429	246117683	A-3	557	14
chr1	246124260	246166120	A-2	474	12
chr1	246166786	246224551	A-3	464	19
chr1	246243490	246342633	A-3	729	6
chr1	246343786	246441620	A-3	749	23
chr1	246634809	246716132	A-3	659	10
chr1	246802605	246830164	A-3	227	7
chr1	246954214	246974795	A-3	240	8
chr1	247085989	247090171	A-1	116	12
chr1	247098272	247100741	A-1	159	15
chr1	247118217	247120548	A-1	115	13
chr1	247133238	247135535	A-1	110	10
chr1	247166500	247168341	A-1	100	6
chr10	168498	172660	A-1	299	17
chr10	520496	521562	A-7	53	10
chr10	660434	661628	B-8	56	7
chr10	724042	726631	A-1	255	7
chr10	965362	968601	A-1	244	6
chr10	1023290	1025670	A-1	134	12
chr10	1083570	1086763	A-1	188	13
chr10	1090587	1094184	A-1	173	20
chr10	1241738	1244762	A-2	94	8
chr10	1244949	1250434	A-3	126	11
chr10	1503833	1509793	B-2	147	7
chr10	1548024	1550867	B-3	78	9
chr10	1558472	1562725	A-3	97	8
chr10	1572276	1575494	B-3	146	6
chr10	1594250	1631005	B-2	610	7
chr10	1672116	1695130	B-2	385	11
chr10	1695401	1760757	A-3	1207	48
chr10	1761804	1779330	A-8	355	24
chr10	1805877	1847136	A-3	543	8
chr10	1940130	1980374	C-3	457	7
chr10	1984630	2024804	A-3	474	9
chr10	2024857	2082394	A-3	541	7
chr10	2082828	2201340	A-3	1237	13
chr10	2231494	2295292	A-3	698	10
chr10	2340999	2372786	A-3	468	21
chr10	2534079	2569798	A-3	494	11
chr10	2622648	2698894	C-3	772	7
chr10	2740684	2800963	C-3	663	7
chr10	2802309	2826886	C-3	298	10
chr10	2939960	2954793	C-2	210	7
chr10	2968093	3004340	A-3	416	7
chr10	3038322	3076699	A-3	527	10
chr10	3098444	3101686	A-1	333	14
chr10	3204055	3206005	A-1	121	13
chr10	3271802	3273074	B-6	48	7
chr10	3811502	3818796	A-1	301	27
chr10	4217361	4227328	C-2	147	6
chr10	4858125	4859224	A-6	94	10
chr10	5444129	5445751	A-1	74	9
chr10	5476489	5482113	A-8	65	11
chr10	5556542	5557054	A-7	23	6
chr10	5747146	5749533	A-1	140	9
chr10	5766389	5768599	A-1	143	14
chr10	5891507	5896441	A-1	182	9
chr10	5970247	5973560	A-1	255	12
chr10	6058147	6060485	A-1	178	10
chr10	6168038	6172806	A-1	185	11
chr10	6226223	6228591	A-1	181	10
chr10	6281028	6287604	A-1	389	17
chr10	6586644	6642563	A-3	623	6
chr10	6642759	6821526	A-3	2007	22
chr10	7488978	7495457	A-6	448	24
chr10	7612303	7615358	A-5	60	6
chr10	7727725	7750185	A-3	337	15
chr10	7868962	7872161	A-1	118	13
chr10	7899502	7901499	A-1	124	15
chr10	8115721	8158463	A-6	1439	129
chr10	10359728	10586393	A-3	1714	10
chr10	10774914	10941650	A-3	1588	10
chr10	10944241	11209324	A-3	2879	48
chr10	11210452	11366973	A-3	2111	38
chr10	11367138	11383681	B-1	256	6
chr10	11383861	11403182	A-3	267	8
chr10	11691802	11695156	A-1	175	9
chr10	11823799	11825359	A-1	137	12
chr10	11904842	11907399	A-1	149	9
chr10	12122568	12125668	A-1	128	20
chr10	12150400	12152293	A-1	92	11
chr10	12210832	12212805	A-1	150	9
chr10	12275574	12280248	A-1	175	18
chr10	12430604	12433631	A-1	249	9
chr10	13082995	13084478	A-6	106	8
chr10	13180790	13183444	A-1	120	12
chr10	13242672	13244462	A-1	81	14
chr10	13381080	13382493	A-1	111	6
chr10	13428027	13432580	A-1	308	18
chr10	13464378	13465986	C-5	56	6
chr10	13521567	13522906	B-4	55	6
chr10	13609705	13611765	A-1	211	6
chr10	13667930	13670059	A-1	73	13
chr10	13787735	13791398	A-8	78	10
chr10	13971427	13974665	B-6	154	13
chr10	14088317	14092855	A-8	80	10
chr10	14683925	14687759	A-1	198	9
chr10	14918991	14921871	A-1	165	12
chr10	14959208	14962537	A-1	201	8
chr10	15034870	15036975	A-1	89	16
chr10	15040792	15042926	A-1	115	12
chr10	15170076	15171415	A-1	76	10
chr10	15178421	15181121	A-1	167	16
chr10	15248282	15251376	A-1	178	9
chr10	15451554	15453826	A-1	205	9
chr10	15754298	15812099	A-3	555	18
chr10	15941018	15944985	A-1	88	12
chr10	16518320	16519546	A-1	60	11
chr10	16601627	16604108	A-6	234	8
chr10	16898312	16900585	A-1	90	13
chr10	17281268	17284198	A-1	86	7
chr10	17309279	17315955	A-6	272	28
chr10	17532138	17537483	A-1	200	10
chr10	17698346	17700282	A-1	155	10
chr10	17724869	17728309	A-1	88	12
chr10	18279223	18295702	A-3	180	6
chr10	18468814	18483692	A-1	271	12
chr10	18588736	18618475	A-2	285	11
chr10	18618687	18735469	A-2	1234	18
chr10	18978714	18981205	A-1	58	14
chr10	18986907	18989944	A-1	129	12
chr10	20143484	20148530	A-1	217	16
chr10	20292609	20352271	A-2	477	6
chr10	21500762	21505022	A-1	230	12
chr10	21823080	21827604	A-1	287	30
chr10	21844970	21850111	A-6	227	11
chr10	21853280	21858706	A-6	248	15
chr10	21861475	21864773	A-1	217	16
chr10	22330420	22332949	A-1	117	14
chr10	22579839	22582744	A-6	200	10
chr10	22644335	22647673	A-1	138	16
chr10	22648901	22652675	A-1	299	11
chr10	22653365	22655398	A-6	111	6
chr10	22663369	22675159	A-6	553	34
chr10	22765456	22767921	A-6	151	10
chr10	23039930	23044267	A-1	239	11
chr10	23256364	23257608	A-1	49	8
chr10	23423516	23426266	A-1	92	9
chr10	23494900	23504373	A-6	298	19
chr10	23511630	23535103	A-6	662	36
chr10	23672534	23674008	A-6	81	7
chr10	23767577	23769769	A-1	268	7
chr10	24021834	24025728	A-6	212	17
chr10	24534949	24539646	A-1	81	6
chr10	25047503	25054328	A-1	331	11
chr10	25280733	25282791	A-6	122	6
chr10	25344124	25346727	A-1	105	14
chr10	25492326	25506033	A-1	303	25
chr10	26262659	26271939	A-1	156	9
chr10	26518216	26664742	A-3	1794	31
chr10	26711245	26788543	A-3	769	20
chr10	26882018	26906152	A-8	277	9
chr10	26915781	26930897	A-2	181	10
chr10	27025902	27028090	A-1	138	7
chr10	27186911	27190903	A-1	135	15
chr10	27428511	27430398	A-1	95	12
chr10	27482310	27485868	A-1	185	17
chr10	27568308	27572694	A-1	195	17
chr10	27581303	27582019	A-6	64	7
chr10	27587441	27588683	A-6	92	9
chr10	27648440	27649424	C-5	50	6
chr10	27832910	27835692	A-1	108	12
chr10	28070239	28076260	A-6	457	38
chr10	28326868	28328297	A-6	98	13
chr10	28630099	28634230	A-1	130	7
chr10	28860123	28864596	A-1	272	18
chr10	29004940	29010754	A-1	244	9
chr10	29738157	29739664	A-6	89	10
chr10	30063599	30066614	A-1	270	13
chr10	30386507	30388982	A-6	150	10
chr10	30676685	30679074	A-1	73	9
chr10	30761777	30767546	A-1	228	24
chr10	31112706	31114676	C-4	97	7
chr10	31359918	31361811	A-1	115	11
chr10	31646934	31656106	A-1	332	38
chr10	31931404	31933071	A-1	92	8
chr10	32088105	32089932	A-1	105	7
chr10	32255060	32259758	A-1	230	24
chr10	32382753	32386121	A-1	144	14
chr10	32672473	32677730	A-1	231	11
chr10	32774485	32776517	A-1	75	10
chr10	33282421	33288793	A-1	228	13
chr10	33309085	33312423	A-1	62	6
chr10	33659250	33666696	A-1	293	16
chr10	35142492	35145873	A-1	260	11
chr10	35418032	35420249	A-1	104	10
chr10	35455372	35457498	A-1	164	18
chr10	35523968	35525532	A-6	19	7
chr10	35932758	35938553	A-8	170	15
chr10	35966531	35973653	A-6	517	22
chr10	36068546	36184307	A-2	968	9
chr10	38184212	38187605	A-1	117	17
chr10	38304586	38306728	A-1	86	11
chr10	38338710	38341346	A-1	106	12
chr10	38422630	38424252	A-1	91	13
chr10	38684680	38691340	A-8	103	10
chr10	38730720	38732604	A-8	144	12
chr10	42057587	42075543	A-8	293	6
chr10	42182028	42186636	A-8	100	11
chr10	42290623	42292352	A-8	76	12
chr10	42367329	42369006	A-1	91	15
chr10	42452482	42455026	A-1	87	10
chr10	42568295	42571007	A-6	236	6
chr10	42597539	42599307	A-1	91	13
chr10	42681268	42682641	C-5	107	8
chr10	42708891	42714554	C-4	149	7
chr10	42748083	42749723	A-6	104	7
chr10	42891799	42893627	A-6	196	12
chr10	42952863	42954988	A-1	165	15
chr10	43017758	43018840	A-6	61	6
chr10	43044235	43046211	A-6	165	7
chr10	43119850	43120767	C-4	45	6
chr10	43138002	43138917	A-8	46	9
chr10	43210097	43214696	A-1	198	12
chr10	43219217	43226015	A-1	346	29
chr10	43251327	43253433	A-1	121	8
chr10	43388719	43390355	A-6	94	10
chr10	43420647	43422683	A-1	82	13
chr10	43463562	43464924	A-1	112	11
chr10	43504735	43506180	C-5	110	8
chr10	44108269	44109607	A-8	63	6
chr10	44162253	44193055	A-2	382	8
chr10	44197794	44202540	A-6	307	17
chr10	44678934	44681386	B-4	100	9
chr10	44773845	44775730	A-1	89	13
chr10	44789918	44791640	B-4	62	6
chr10	44792641	44797338	A-7	79	8
chr10	44815682	44818185	A-1	111	18
chr10	45188344	45190677	A-1	147	12
chr10	45234145	45236399	B-6	95	7
chr10	45408113	45411020	A-1	117	10
chr10	45487133	45489076	A-1	128	10
chr10	45541863	45543721	A-1	104	7
chr10	46390022	46391639	A-6	139	8
chr10	46412361	46413664	A-6	110	7
chr10	46502809	46503706	A-6	42	9
chr10	47123553	47126779	A-1	166	9
chr10	47974205	47975897	A-1	89	11
chr10	48058295	48059615	A-6	125	9
chr10	49184159	49186201	A-1	164	6
chr10	49343019	49345005	A-6	125	6
chr10	49401341	49402643	A-6	137	8
chr10	49482533	49483703	A-6	65	13
chr10	49531636	49535206	A-1	122	8
chr10	49791899	49796003	A-2	26	7
chr10	49989713	49993838	A-6	127	9
chr10	50055209	50069075	A-2	137	9
chr10	50176663	50177467	A-8	27	9
chr10	50269284	50277904	A-6	314	18
chr10	50416223	50418279	A-1	115	11
chr10	50479443	50494070	A-6	512	36
chr10	50540591	50561818	A-8	198	17
chr10	50638320	50643335	A-1	131	17
chr10	50645945	50647366	C-4	100	6
[truncated: 15,256 more rows]
